# Supplementary material for: Reaction probability and kinetics of water splitting on the penta-NiAs2 monolayer from an ab initio molecular dynamics investigation
Source: Royal Society of Chemistry journal article supplement (doi:10.1039/d0cp02418j), 2020-01-01
Supplement: d0cp02418j1.pdf [file d0cp02418j1.pdf]

## Supporting Information

for

### Reaction Probability and Kinetics of H<sub>2</sub>O Splitting on the Penta-NiAs<sub>2</sub> Monolayer from an Ab Initio Molecular Dynamics Investigation

Thi H. Ho,<sup>a,b</sup> Hieu C. Dong,<sup>c,d</sup> Viet Q Bui,<sup>e</sup> Yoshiyuki Kawazoe<sup>f</sup> and Hung M. Le<sup>g</sup>

<sup>a</sup>Division of Computational Physics, Institute for Computational Science, Ton DucThang University, Ho Chi Minh City 700000, Vietnam.

<sup>b</sup>Faculty of Applied Sciences, Ton Duc Thang University, Ho Chi Minh City 700000, Vietnam.

<sup>c</sup>Future Materials and Devices Laboratory, Institute of Fundamental and Applied Sciences, Duy Tan University, Ho Chi Minh City 700000, Vietnam.

<sup>d</sup>The Faculty of Natural Sciences, Duy Tan University, Da Nang, 550000, Vietnam.

<sup>e</sup>Department of Chemistry, Sungkyunkwan University (SKKU), Suwon, 16419, Republic of Korea.

<sup>f</sup>New Industry Creation Hatchery Center, Tohoku University, Sendai, 980-8579, Japan.

<sup>g</sup>Institute of Research and Development, Duy Tan University, Danang 550000, Vietnam.

Email: hohuynhthi@tdtu.edu.vn, hung.m.le@hotmail.com.

### 0<sup>th</sup> order

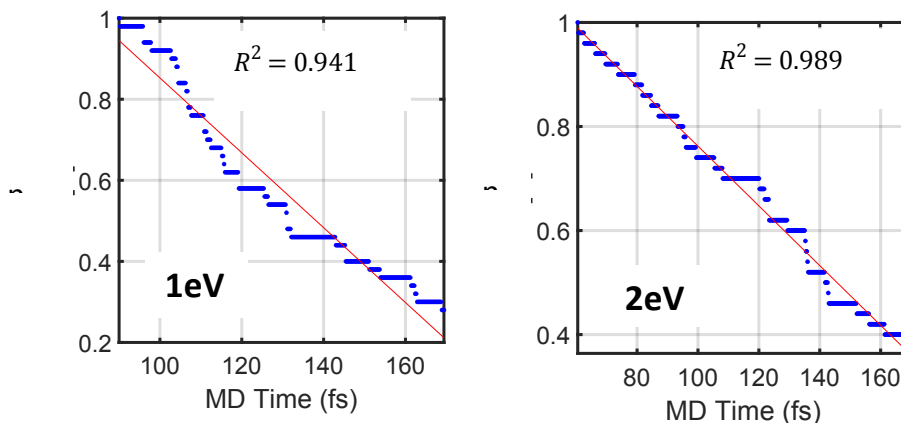

### O-H<sup>2</sup> Dissociation

### 1<sup>st</sup> order

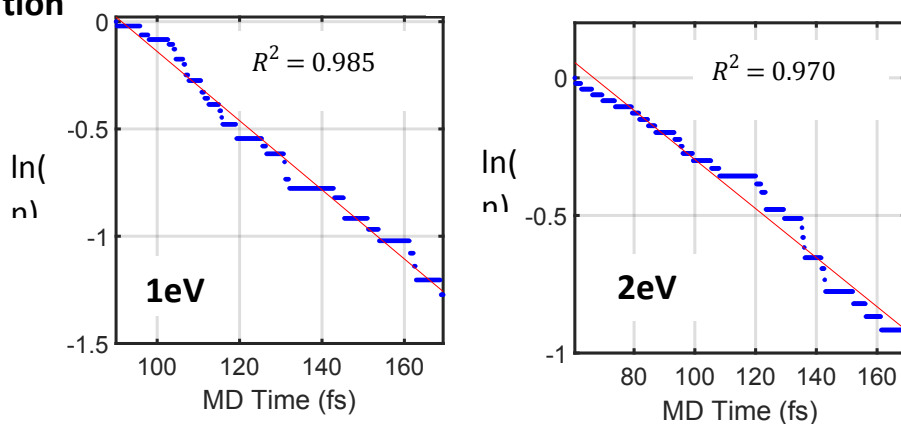

### 2<sup>nd</sup> order

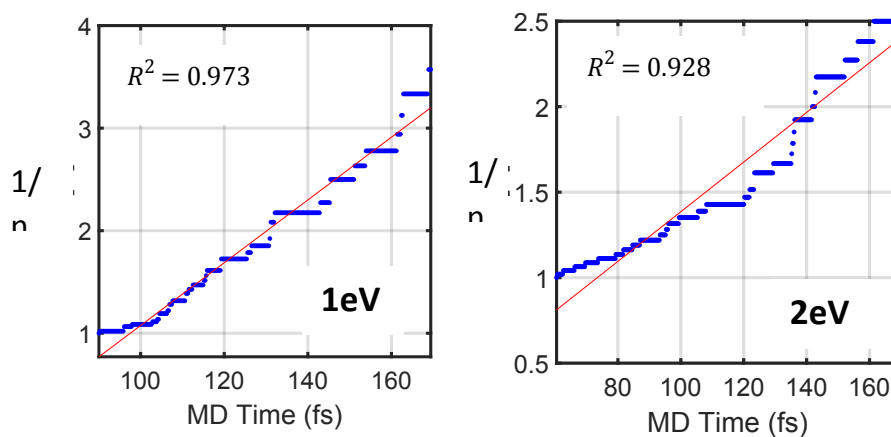

**Figure S1:** Fitting plots for rate constant of the first O-H dissociation with respect to initial kinetic energy of 1 eV (left panel) and 2 eV (right panel) for zeroth, first, and second order types, respectively. In each plot,  $n$  is the concentration ratio of remaining H<sub>2</sub>O samples with respect to MD time. The red lines represent the fitting line and blue dots are actually data.

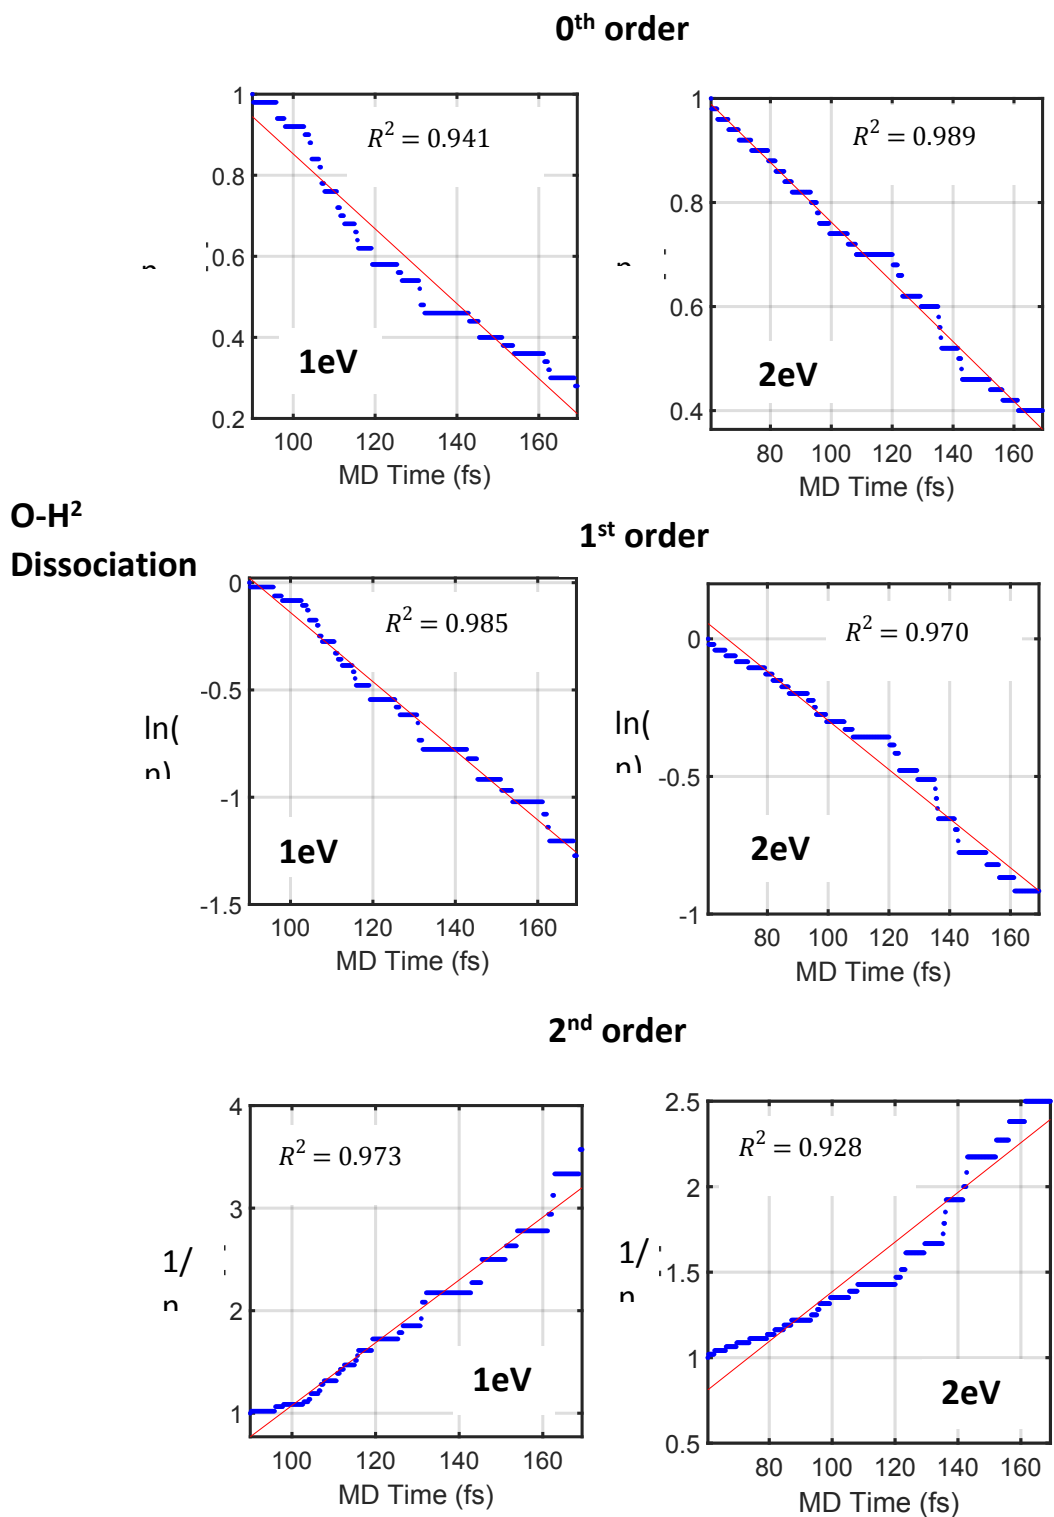

**Figure S2:** Fitting plots for rate constant of the second O-H dissociation with respect to initial kinetic energy of 1 eV (left panel) and 2 eV (right panel) for zeroth, first, and second order types, respectively. In each plot,  $n$  is the concentration ratio of remaining  $\text{H}_2\text{O}$  samples with respect to MD time. The red lines represent the fitting line and blue dots are actually data.

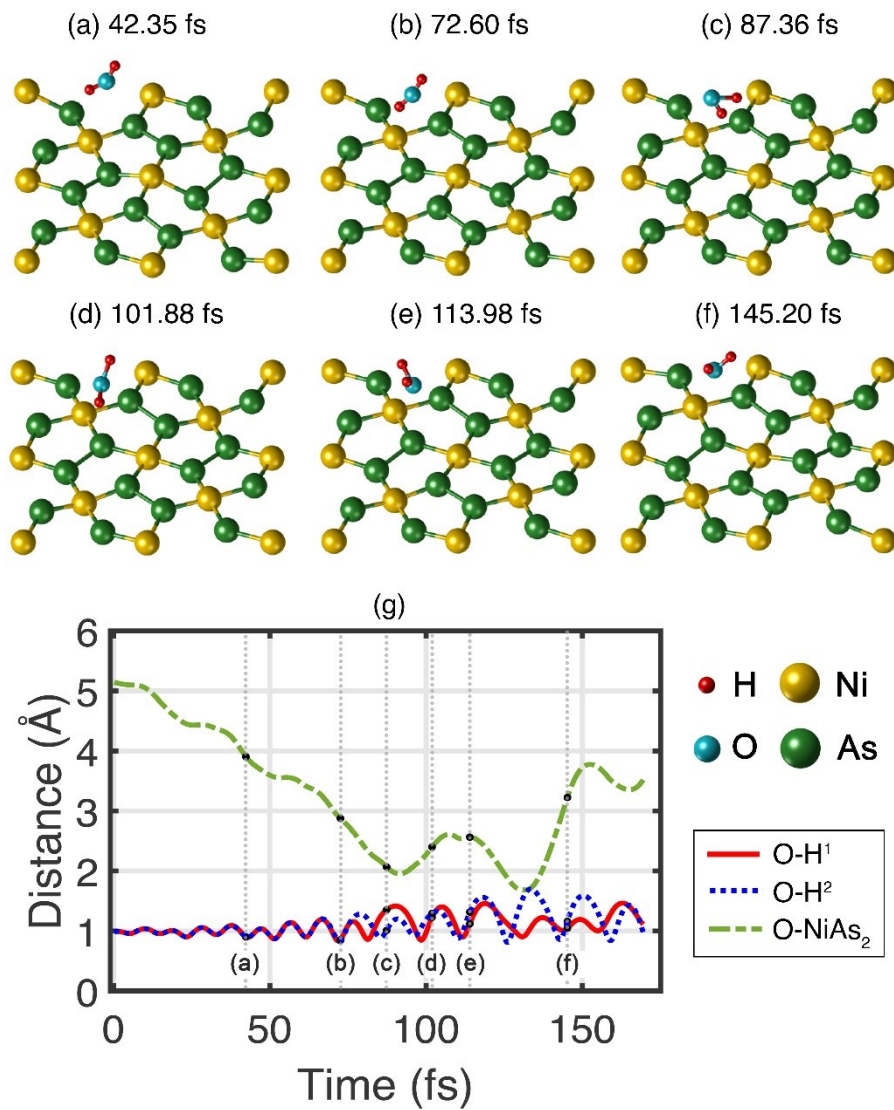

**Fig. S3** (a)-(f) Snapshots of the H<sub>2</sub>O molecule on the NiAs<sub>2</sub> surface for a non-reacting case, (g) two O-H distances (red solid and blue dotted lines) and projected distance between O and the NiAs<sub>2</sub> surface (green dashed line) with respect to time. The black dots and vertical lines indicate selected configurations shown in (a)-(f).
